# Supplementary material for: HtrA1 in Gestational Diabetes Mellitus: A Possible Biomarker?
Source: MDPI journal article supplement (doi:10.3390/diagnostics12112705), 2022-11-05
Supplement: s1 [file s1]

| ID   | Maternal age | smoking | Diet | Physical activity | BMI pre-pregnancy | BMI actual | Type of delivery | Gestational age at delivery (weeks) | Neonatal gender | Birth weight (g) | HtA1 (ng/ml) |
|------|--------------|---------|------|-------------------|-------------------|------------|------------------|-------------------------------------|-----------------|------------------|--------------|
| 35   | 27           | 0       | 4    | 1                 | 19,44             | 20,06      | 0                | 38                                  | 1               | 3100             | 0,62         |
| 62   | 27           | 0       | 3    | 1                 | 39,54             | 39,54      | 1                | 38                                  | 1               | 2990             | 1,03         |
| 83   | 21           | 1       | 3    | 0                 | 26,23             | 27,78      | 0                | 40                                  | 1               | 3640             | 1,37         |
| 137  | 35           | 0       | 4    | 1                 | 23,10             | 24,17      | 0                | 39                                  | 1               | 3890             | 0,52         |
| 204  | 30           | 0       | 3    | 0                 | 20,79             | 21,13      | 0                | 38                                  | 1               | 3030             | 0,47         |
| 260  | 32           | 0       | 3    | 0                 | 30,86             | 31,25      | 0                | 40                                  | 1               | 4250             | 1,32         |
| 401  | 44           | 0       | 4    | 1                 | 24,44             | 24,92      | 1                | 39                                  | 0               | 4040             | 2,22         |
| 462  | 37           | 0       | 2    | 1                 | 24,22             | 26,17      | 1                | 38                                  | 0               | 4800             | 1,24         |
| 383  | 34           | 0       | 2    | 1                 | 20,76             | 21,45      | 0                | 38                                  | 1               | 2630             | 1,11         |
| 419  | 32           | 0       | 3    | 1                 | 24,02             | 24,74      | 0                | 39                                  | 1               | 3150             | 0,78         |
| 478  | 29           | 0       | 3    | 1                 | 30,86             | 31,99      | 1                | 40                                  | 0               | 3310             | 0,99         |
| 504  | 38           | 0       | 4    | 0                 | 27,89             | 29,00      | 0                | 39                                  | 0               | 2850             | 1,12         |
| 570  | 29           | 0       | 2    | 1                 | 20,15             | 20,48      | 0                | 40                                  | 1               | 3840             | 0,54         |
| 583  | 37           | 0       | 2    | 1                 | 18,65             | 19,54      | 1                | 41                                  | 0               | 3100             | 0,54         |
| 642  | 31           | 0       | 2    | 1                 | 20,50             | 21,16      | 0                | 40                                  | 0               | 3810             | 1,11         |
| 720  | 36           | 0       | 2    | 1                 | 21,91             | 21,97      | 0                | 37                                  | 1               | 4180             | 1,22         |
| 616  | 34           | 2       | 3    | 1                 | 21,85             | 23,72      | 0                | 40                                  | 1               | 4010             | 0,61         |
| 862  | 24           | 2       | 3    | 1                 | 23,31             | 23,67      | 1                | 41                                  | 1               | 3522             | 1,50         |
| 879  | 36           | 0       | 1    | 1                 | 29,38             | 29,38      | 0                | 40                                  | 0               | 3560             | 0,78         |
| 952  | 24           | 0       | 4    | 3                 | 24,97             | 25,81      | 0                | 41                                  | 0               | 3460             | 0,92         |
| 959  | 27           | 2       | 3    | 1                 | 20,07             | 21,11      | 0                | 41                                  | 0               | 3050             | 1,09         |
| 965  | 26           | 0       | 2    | 1                 | 35,16             | 35,16      | 0                | 40                                  | 0               | 3960             | 0,77         |
| 985  | 29           | 0       | 2    | 0                 | 29,97             | 29,97      | 0                | 40                                  | 1               | 3430             | 1,18         |
| 992  | 33           | 1       | 2    | 1                 | 22,86             | 23,95      | 0                | 39                                  | 1               | 3490             | 1,18         |
| 999  | 37           | 0       | 2    | 3                 | 22,49             | 23,18      | 0                | 41                                  | 1               | 3910             | 0,48         |
| 1017 | 34           | 0       | 2    | 1                 | 22,49             | 24,22      | 1                | 39                                  | 0               | 3830             | 1,02         |
| 1027 | 29           | 0       | 2    | 1                 | 20,08             | 21,16      | 0                | 40                                  | 1               | 3420             | 1,64         |
| 1040 | 27           | 0       | 2    | 0                 | 30,67             | 30,12      | 1                | 38                                  | 1               | 4010             | 0,41         |

GDM

|         |   |
|---------|---|
| Smoking |   |
| Not     | 0 |
| Yes     | 1 |
| ex      | 2 |

|           |   |
|-----------|---|
| Diet      |   |
| very poor | 0 |
| poor      | 1 |
| mediocre  | 2 |
| mean      | 3 |
| good      | 4 |
| very good | 5 |

|                                                                                               |   |
|-----------------------------------------------------------------------------------------------|---|
| Physical activity                                                                             |   |
| Walking (over 30 min) / moderate physical activity (e.g. specific courses for pregnant women) |   |
| yes/yes                                                                                       | 1 |
| yes/not                                                                                       | 2 |
| not/yes                                                                                       | 3 |
| not/not                                                                                       | 4 |

|                  |   |
|------------------|---|
| Type of delivery |   |
| Vaginal          | 0 |
| C-section        | 1 |

|                 |   |
|-----------------|---|
| Neonatal gender |   |
| female          | 0 |
| male            | 1 |

|     |    |   |   |   |       |       |   |    |   |      |      |
|-----|----|---|---|---|-------|-------|---|----|---|------|------|
| 5   | 32 | 0 | 5 | 1 | 25,15 | 25,53 | 1 | 41 | 1 | 4170 | 1,33 |
| 14  | 29 | 0 | 3 | 1 | 21,55 | 22,26 | 0 | 40 | 0 | 3650 | 2,12 |
| 15  | 38 | 1 | 4 | 0 | 24,34 | 25,15 | 0 | 39 | 0 | 2900 | 1,19 |
| 16  | 25 | 0 | 4 | 1 | 27,73 | 28,13 | 0 | 41 | 0 | 3450 | 0,52 |
| 17  | 32 | 0 | 4 | 3 | 19,92 | 19,92 | 0 | 39 | 0 | 2866 | 1,17 |
| 20  | 30 | 0 | 3 | 3 | 20,88 | 21,38 | 0 | 40 | 0 | 3500 | 2,37 |
| 29  | 29 | 0 | 4 | 0 | 24,22 | 24,22 | 0 | 38 | 0 | 2990 | 2,80 |
| 34  | 27 | 0 | 4 | 1 | 18,75 | 18,16 | 0 | 40 | 0 | 3150 | 1,68 |
| 44  | 32 | 0 | 3 | 1 | 21,30 | 21,67 | 1 | 39 | 1 | 3450 | 1,52 |
| 52  | 26 | 0 | 3 | 1 | 23,03 | 23,56 | 0 | 40 | 0 | 3720 | 1,23 |
| 56  | 32 | 0 | 4 | 3 | 30,11 | 28,89 | 0 | 39 | 1 | 2950 | 1,83 |
| 57  | 26 | 2 | 3 | 1 | 19,65 | 20,57 | 0 | 41 | 1 | 3700 | 1,90 |
| 58  | 36 | 0 | 4 | 1 | 20,80 | 21,87 | 0 | 41 | 0 | 3750 | 1,78 |
| 63  | 30 | 0 | 4 | 3 | 27,78 | 27,78 | 0 | 41 | 0 | 3600 | 0,59 |
| 70  | 32 | 0 | 3 | 1 | 22,50 | 23,03 | 0 | 41 | 0 | 3310 | 2,59 |
| 76  | 32 | 0 | 3 | 1 | 21,51 | 21,69 | 0 | 41 | 1 | 3660 | 2,18 |
| 82  | 31 | 0 | 4 | 3 | 22,07 | 22,07 | 0 | 40 | 1 | 3230 | 1,24 |
| 87  | 31 | 2 | 4 | 0 | 23,74 | 24,80 | 0 | 40 | 0 | 4240 | 2,39 |
| 106 | 26 | 0 | 5 | 1 | 20,06 | 21,91 | 0 | 40 | 0 | 3744 | 0,38 |
| 109 | 31 | 2 | 2 | 0 | 21,63 | 20,34 | 0 | 40 | 0 | 3170 | 1,06 |
| 112 | 27 | 0 | 3 | 1 | 17,63 | 18,61 | 0 | 40 | 0 | 3410 | 0,91 |
| 117 | 23 | 2 | 4 | 1 | 18,94 | 19,10 | 0 | 40 | 1 | 2890 | 1,18 |
| 121 | 24 | 0 | 4 | 0 | 22,23 | 22,41 | 0 | 39 | 0 | 3550 | 0,32 |
| 126 | 30 | 0 | 3 | 3 | 24,49 | 24,73 | 0 | 41 | 0 | 3240 | 0,99 |
| 127 | 24 | 0 | 4 | 3 | 21,64 | 22,94 | 1 | 41 | 1 | 3800 | 0,78 |
| 128 | 32 | 2 | 3 | 1 | 21,06 | 21,06 | 0 | 40 | 1 | 3350 | 0,25 |
| 129 | 29 | 0 | 4 | 0 | 28,41 | 28,38 | 0 | 40 | 1 | 3170 | 0,26 |
| 134 | 34 | 0 | 3 | 1 | 20,07 | 21,45 | 1 | 39 | 0 | 3320 | 0,30 |
| 143 | 35 | 2 | 4 | 3 | 19,63 | 19,63 | 0 | 41 | 0 | 3170 | 0,50 |
| 147 | 29 | 0 | 3 | 1 | 22,53 | 25,14 | 0 | 37 | 0 | 2800 | 0,21 |
| 159 | 37 | 0 | 4 | 0 | 19,07 | 20,28 | 0 | 41 | 0 | 3070 | 0,85 |
| 161 | 25 | 1 | 4 | 1 | 22,68 | 24,54 | 0 | 38 | 0 | 3350 | 0,73 |
| 164 | 30 | 2 | 4 | 0 | 24,34 | 26,70 | 0 | 40 | 0 | 4200 | 1,59 |
| 166 | 32 | 2 | 2 | 0 | 23,62 | 22,98 | 0 | 37 | 1 | 2760 | 1,94 |
| 170 | 32 | 0 | 3 | 1 | 15,67 | 16,98 | 0 | 38 | 0 | 2700 | 1,03 |
| 173 | 32 | 0 | 4 | 0 | 22,32 | 22,68 | 1 | 40 | 0 | 3250 | 0,17 |
| 194 | 26 | 0 | 2 | 0 | 25,39 | 25,39 | 0 | 40 | 0 | 3650 | 0,52 |
| 197 | 26 | 0 | 3 | 0 | 23,44 | 24,44 | 0 | 40 | 0 | 3650 | 0,65 |
| 199 | 39 | 2 | 4 | 0 | 35,38 | 37,46 | 1 | 41 | 1 | 3540 | 0,72 |
| 201 | 33 | 0 | 5 | 1 | 21,45 | 22,58 | 0 | 41 | 1 | 3410 | 0,42 |
| 205 | 25 | 0 | 3 | 1 | 18,83 | 20,43 | 0 | 40 | 0 | 3000 | 0,75 |
| 207 | 22 | 0 | 2 | 1 | 18,42 | 19,84 | 1 | 39 | 0 | 3200 | 1,50 |
| 209 | 30 | 0 | 2 | 0 | 32,39 | 32,01 | 0 | 39 | 1 | 3160 | 1,10 |
| 211 | 21 | 0 | 3 | 3 | 19,95 | 20,70 | 0 | 40 | 0 | 3040 | 0,93 |
| 214 | 27 | 0 | 3 | 0 | 21,09 | 21,88 | 0 | 40 | 0 | 2930 | 0,35 |
| 215 | 33 | 0 | 3 | 0 | 18,62 | 19,57 | 0 | 40 | 1 | 3480 | 0,33 |
| 216 | 27 | 0 | 3 | 1 | 22,98 | 23,51 | 0 | 39 | 0 | 2960 | 0,41 |
| 217 | 23 | 0 | 3 | 1 | 19,71 | 20,08 | 0 | 38 | 1 | 3100 | 0,34 |
| 220 | 27 | 2 | 1 | 0 | 22,86 | 22,86 | 0 | 41 | 1 | 4206 | 0,89 |
| 228 | 29 | 0 | 3 | 0 | 19,83 | 20,57 | 0 | 38 | 1 | 2970 | 0,53 |
| 244 | 33 | 2 | 3 | 1 | 30,12 | 29,76 | 1 | 39 | 0 | 3210 | 1,08 |
| 246 | 32 | 0 | 4 | 1 | 28,91 | 29,69 | 0 | 38 | 1 | 3330 | 0,55 |
| 252 | 36 | 2 | 3 | 0 | 28,23 | 28,23 | 0 | 39 | 0 | 3100 | 0,70 |
| 266 | 27 | 0 | 2 | 0 | 17,50 | 18,07 | 0 | 38 | 0 | 3730 | 0,54 |
| 269 | 36 | 0 | 4 | 1 | 23,81 | 24,01 | 1 | 41 | 1 | 3450 | 0,46 |
| 273 | 24 | 2 | 3 | 1 | 20,80 | 22,05 | 0 | 40 | 0 | 3380 | 0,33 |
| 274 | 31 | 0 | 3 | 1 | 23,21 | 22,85 | 0 | 41 | 0 | 3240 | 0,53 |
| 278 | 31 | 0 | 4 | 1 | 20,70 | 20,70 | 1 | 39 | 0 | 3290 | 0,12 |
| 279 | 31 | 2 | 2 | 1 | 22,94 | 24,13 | 0 | 39 | 1 | 2550 | 0,05 |
| 280 | 29 | 0 | 3 | 0 | 20,57 | 22,04 | 0 | 39 | 0 | 3350 | 0,39 |
| 282 | 34 | 0 | 3 | 1 | 20,55 | 23,03 | 0 | 41 | 1 | 3480 | 0,11 |
| 283 | 34 | 0 | 3 | 1 | 23,59 | 23,59 | 0 | 41 | 1 | 3490 | 0,61 |
| 295 | 37 | 0 | 3 | 1 | 22,59 | 23,31 | 1 | 38 | 0 | 4000 | 0,45 |
| 296 | 33 | 0 | 4 | 1 | 18,00 | 18,73 | 0 | 40 | 1 | 3690 | 1,24 |
| 298 | 26 | 0 | 3 | 0 | 21,63 | 22,65 | 0 | 41 | 1 | 3770 | 0,83 |
| 304 | 35 | 0 | 3 | 1 | 24,80 | 25,33 | 1 | 41 | 1 | 4070 | 0,38 |
| 308 | 33 | 2 | 3 | 0 | 22,76 | 24,30 | 0 | 36 | 1 | 2555 | 0,62 |
| 310 | 34 | 2 | 3 | 1 | 17,58 | 17,97 | 0 | 41 | 0 | 3080 | 0,58 |
| 312 | 30 | 0 | 3 | 1 | 19,72 | 20,55 | 1 | 40 | 0 | 3410 | 0,65 |
| 315 | 35 | 0 | 2 | 1 | 18,87 | 19,60 | 1 | 41 | 0 | 2960 | 0,01 |
| 321 | 29 | 0 | 4 | 1 | 17,43 | 17,43 | 1 | 38 | 1 | 3250 | 0,18 |
| 323 | 33 | 0 | 4 | 1 | 20,06 | 20,99 | 0 | 40 | 0 | 3830 | 0,34 |
| 327 | 32 | 1 | 2 | 0 | 19,53 | 20,70 | 0 | 35 | 1 | 2754 | 0,68 |
| 336 | 20 | 1 | 2 | 0 | 19,23 | 19,96 | 1 | 41 | 0 | 3700 | 0,42 |
| 341 | 31 | 0 | 3 | 1 | 19,61 | 20,11 | 0 | 41 | 1 | 3140 | 0,44 |
| 346 | 39 | 0 | 3 | 1 | 21,30 | 21,85 | 0 | 41 | 0 | 3980 | 0,20 |
| 354 | 31 | 0 | 2 | 1 | 18,52 | 18,90 | 0 | 39 | 0 | 3550 | 0,25 |
| 363 | 32 | 0 | 3 | 1 | 21,11 | 21,45 | 1 | 40 | 0 | 3860 | 0,10 |
| 366 | 37 | 0 | 3 | 1 | 18,73 | 19,47 | 0 | 38 | 1 | 3500 | 0,59 |
| 368 | 28 | 0 | 2 | 1 | 25,95 | 26,30 | 0 | 40 | 0 | 3980 | 0,15 |
| 369 | 31 | 0 | 3 | 1 | 18,17 | 18,69 | 0 | 38 | 0 | 2700 | 0,22 |
| 370 | 18 | 0 | 3 | 0 | 16,16 | 16,16 | 0 | 40 | 0 | 3370 | 0,93 |
| 378 | 32 | 0 | 3 | 1 | 23,67 | 23,92 | 1 | 40 | 0 | 3570 | 0,30 |
| 381 | 35 | 0 | 4 | 1 | 23,24 | 23,24 | 0 | 40 | 0 | 3484 | 0,18 |
| 396 | 33 | 0 | 3 | 1 | 18,83 | 19,43 | 0 | 41 | 0 | 3130 | 0,53 |
| 398 | 26 | 1 | 1 | 1 | 19,31 | 19,31 | 0 | 39 | 1 | 2628 | 0,39 |
| 399 | 33 | 0 | 3 | 0 | 23,93 | 22,86 | 0 | 39 | 1 | 3980 | 0,30 |
| 405 | 29 | 0 | 3 | 1 | 19,75 | 20,68 | 0 | 38 | 0 | 4000 | 0,22 |
| 406 | 28 | 1 | 3 | 1 | 21,38 | 22,05 | 0 | 40 | 0 | 2940 | 0,44 |
| 411 | 38 | 0 | 3 | 1 | 22,43 | 22,43 | 1 | 40 | 1 | 3500 | 0,15 |
| 414 | 38 | 0 | 3 | 1 | 29,39 | 32,00 | 0 | 38 | 0 | 3550 | 1,28 |
| 415 | 34 | 0 | 4 | 1 | 22,74 | 23,02 | 0 | 41 | 1 | 3440 | 0,40 |
| 420 | 25 | 0 | 3 | 0 | 19,47 | 19,83 | 0 | 40 | 1 | 3200 | 0,35 |
| 421 | 36 | 0 | 3 | 1 | 21,30 | 21,67 | 0 | 40 | 0 | 3400 | 0,45 |
| 422 | 36 | 0 | 3 | 1 | 22,66 | 23,83 | 0 | 40 | 0 | 3430 | 0,84 |
| 424 | 27 | 0 | 4 | 1 | 21,12 | 21,36 | 0 | 40 | 0 | 3170 | 0,43 |
| 425 | 38 | 0 | 3 | 0 | 20,76 | 21,80 | 0 | 38 | 1 | 3650 | 0,18 |
| 428 | 38 | 0 | 3 | 1 | 25,71 | 25,71 | 1 | 39 | 0 | 3660 | 0,57 |
| 435 | 33 | 0 | 4 | 1 | 24,14 | 24,97 | 1 | 39 | 0 | 2780 | 0,54 |
| 440 | 31 | 0 | 4 | 1 | 18,29 | 19,36 | 0 | 40 | 0 | 2930 | 0,41 |
| 442 | 32 | 0 | 2 | 1 | 19,72 | 20,33 | 0 | 39 | 0 | 3480 | 0,60 |
| 443 | 35 | 0 | 2 | 0 | 20,88 | 21,55 | 0 | 40 | 1 | 3030 | 0,64 |
| 447 | 31 | 0 | 3 | 1 | 22,05 | 22,39 | 0 | 40 | 1 | 3910 | 0,49 |
| 450 | 35 | 0 | 3 | 1 | 23,66 | 23,66 | 0 | 40 | 0 | 3820 | 0,20 |
| 454 | 28 | 0 | 3 | 1 | 20,57 | 21,22 | 1 | 40 | 0 | 2890 | 0,65 |
| 461 | 30 | 0 | 3 | 0 | 18,00 | 19,10 | 0 | 40 | 1 | 3370 | 0,32 |
| 465 | 37 | 0 | 3 | 1 | 20,02 | 20,44 | 1 | 40 | 0 | 2670 | 0,77 |
| 466 | 29 | 2 | 2 | 0 | 22,72 | 23,05 | 0 | 41 | 0 | 3000 | 0,57 |
| 468 | 27 | 0 | 3 | 0 | 25,39 | 27,34 | 0 | 40 | 0 | 3490 | 0,83 |
| 474 | 32 | 0 | 2 | 0 | 22,88 | 20,69 | 0 | 39 | 0 | 3340 | 0,29 |
| 475 | 4  | 0 | 3 | 1 | 20,96 | 21,72 | 0 | 39 | 1 | 3380 | 0,36 |
| 481 | 22 | 0 | 2 | 0 | 23,42 | 24,54 | 0 | 40 | 0 | 3870 | 2,04 |
| 484 | 34 | 0 | 1 | 0 | 23,62 | 24,88 | 0 | 40 | 0 | 2860 | 0,58 |
| 488 | 36 | 0 | 3 | 1 | 25,65 | 25,65 | 0 | 39 | 0 | 3100 | 0,44 |
| 494 | 39 | 0 | 2 | 0 | 25,77 | 26,85 | 0 | 41 | 1 | 3740 | 0,78 |
| 496 | 33 | 0 | 4 | 1 | 21,61 | 21,61 | 0 | 40 | 0 | 2840 | 0,75 |
| 502 | 32 | 0 | 4 | 1 | 19,68 | 20,83 | 0 | 39 | 0 | 3680 | 0,28 |
| 503 | 32 | 0 | 4 | 1 | 20,90 | 21,97 | 0 | 40 | 1 | 3000 | 0,15 |
| 512 | 27 | 2 | 3 | 0 | 21,51 | 21,51 | 1 | 38 | 1 | 3775 | 0,92 |
| 513 | 26 | 0 | 3 | 1 | 24,73 | 24,73 | 0 | 38 | 0 | 3170 | 0,37 |
| 514 | 31 | 0 | 2 | 0 | 21,63 | 21,63 | 0 | 36 | 1 | 3420 | 0,69 |
| 515 | 28 | 0 | 4 | 1 | 20,89 | 28,30 | 0 | 40 | 0 | 3470 | 0,74 |
| 518 | 32 | 0 | 2 | 0 | 20,82 | 20,82 | 0 | 41 | 0 | 3040 | 0,40 |
| 521 | 35 | 0 | 4 | 3 | 23,83 | 25,07 | 0 | 40 | 0 | 3600 | 0,40 |
| 523 | 36 | 0 | 2 | 1 | 19,72 | 18,69 | 1 | 39 | 0 | 3550 | 0,20 |
| 524 | 31 | 0 | 2 | 0 | 20,31 | 20,86 | 0 | 40 | 0 | 3380 | 0,45 |
| 531 | 29 | 0 | 1 | 1 | 22,31 | 22,87 | 0 | 38 | 1 | 3430 | 0,76 |
| 537 | 35 | 0 | 3 | 1 | 28,37 | 28,72 | 0 | 40 | 1 | 3830 | 1,25 |
| 542 | 32 | 0 | 3 | 1 | 19,92 | 20,12 | 1 | 39 | 0 | 3090 | 1,05 |
| 546 | 24 | 2 | 3 | 0 | 24,01 | 24,39 | 0 | 39 | 0 | 2830 | 0,46 |
| 547 | 30 | 0 | 4 | 1 | 21,45 | 21,80 | 0 | 38 | 1 | 3170 | 0,25 |
| 549 | 39 | 0 | 3 | 0 | 32,42 | 31,25 | 0 | 38 | 0 | 3350 | 1,1  |

|      |    |   |   |   |       |       |   |    |   |      |      |
|------|----|---|---|---|-------|-------|---|----|---|------|------|
| 584  | 27 | 0 | 4 | 1 | 20,76 | 20,76 | 0 | 40 | 1 | 3280 | 0.56 |
| 586  | 26 | 2 | 2 | 0 | 18,44 | 18,82 | 0 | 41 | 0 | 3140 | 0.77 |
| 597  | 34 | 0 | 2 | 0 | 18,37 | 18,73 | 0 | 35 | 1 | 2925 | 0.66 |
| 599  | 41 | 0 | 2 | 1 | 20,32 | 21,38 | 1 | 40 | 1 | 3470 | 0.96 |
| 602  | 38 | 0 | 3 | 1 | 23,32 | 24,00 | 0 | 41 | 1 | 3350 | 1.43 |
| 613  | 28 | 0 | 3 | 0 | 30,49 | 30,49 | 1 | 41 | 1 | 3870 | 0.66 |
| 615  | 30 | 2 | 3 | 0 | 18,69 | 19,90 | 0 | 40 | 0 | 3420 | 0.81 |
| 623  | 35 | 0 | 2 | 0 | 19,72 | 20,13 | 1 | 37 | 1 | 2640 | 0.88 |
| 627  | 29 | 0 | 4 | 1 | 25,39 | 27,34 | 0 | 38 | 1 | 3670 | 1.26 |
| 628  | 32 | 0 | 4 | 3 | 20,03 | 20,63 | 1 | 39 | 0 | 3225 | 0.89 |
| 633  | 29 | 0 | 4 | 1 | 18,22 | 19,52 | 0 | 39 | 0 | 3280 | 1.20 |
| 634  | 33 | 2 | 2 | 1 | 19,63 | 20,43 | 0 | 40 | 1 | 2890 | 0.62 |
| 635  | 32 | 0 | 3 | 1 | 20,70 | 21,09 | 1 | 40 | 1 | 3730 | 0.36 |
| 636  | 31 | 0 | 4 | 1 | 20,20 | 20,57 | 0 | 39 | 1 | 3350 | 0.95 |
| 640  | 37 | 0 | 3 | 3 | 18,74 | 20,78 | 0 | 37 | 1 | 3050 | 0.74 |
| 643  | 30 | 2 | 3 | 1 | 21,26 | 22,32 | 0 | 41 | 1 | 3850 | 0.79 |
| 647  | 28 | 0 | 2 | 0 | 32,91 | 32,91 | 0 | 41 | 1 | 3540 | 0.63 |
| 651  | 30 | 0 | 3 | 0 | 24,97 | 25,81 | 0 | 40 | 0 | 3300 | 1.93 |
| 657  | 32 | 2 | 2 | 1 | 18,43 | 19,23 | 0 | 40 | 0 | 3118 | 0.70 |
| 776  | 32 | 0 | 3 | 1 | 24,84 | 24,00 | 0 | 40 | 1 | 3560 | 0.82 |
| 826  | 34 | 0 | 4 | 0 | 21,48 | 21,48 | 0 | 40 | 1 | 3520 | 0.40 |
| 827  | 22 | 1 | 3 | 0 | 29,17 | 29,55 | 1 | 40 | 0 | 3020 | 0.56 |
| 830  | 40 | 0 | 5 | 3 | 18,73 | 19,47 | 0 | 40 | 0 | 3430 | 0.42 |
| 850  | 37 | 0 | 4 | 0 | 22,76 | 22,95 | 0 | 37 | 0 | 2510 | 0.41 |
| 851  | 28 | 2 | 2 | 1 | 19,13 | 20,37 | 0 | 41 | 0 | 3040 | 1.34 |
| 854  | 34 | 0 | 3 | 3 | 19,59 | 19,92 | 0 | 39 | 0 | 3300 | 0.43 |
| 857  | 34 | 0 | 2 | 1 | 20,32 | 21,45 | 0 | 40 | 1 | 4090 | 0.52 |
| 861  | 40 | 0 | 2 | 1 | 22,96 | 22,77 | 0 | 40 | 0 | 3060 | 0.87 |
| 863  | 36 | 0 | 2 | 1 | 20,32 | 20,89 | 0 | 39 | 1 | 3240 | 0.41 |
| 865  | 29 | 0 | 2 | 0 | 18,65 | 19,72 | 0 | 38 | 1 | 3060 | 1.53 |
| 868  | 32 | 0 | 2 | 1 | 32,87 | 33,91 | 0 | 39 | 1 | 3720 | 0.62 |
| 873  | 35 | 0 | 3 | 1 | 20,70 | 21,88 | 0 | 40 | 1 | 3050 | 1.68 |
| 876  | 32 | 0 | 2 | 1 | 23,71 | 24,09 | 0 | 41 | 0 | 3330 | 1.13 |
| 877  | 23 | 2 | 2 | 1 | 30,10 | 30,80 | 0 | 41 | 0 | 3460 | 0.73 |
| 878  | 27 | 0 | 1 | 1 | 23,24 | 24,39 | 0 | 40 | 1 | 3300 | 0.75 |
| 880  | 27 | 2 | 2 | 1 | 19,62 | 21,03 | 0 | 40 | 1 | 3460 | 0.76 |
| 882  | 36 | 2 | 1 | 1 | 20,68 | 20,86 | 0 | 39 | 1 | 3250 | 0.41 |
| 888  | 28 | 0 | 2 | 0 | 20,81 | 20,81 | 0 | 39 | 1 | 3330 | 0.99 |
| 896  | 26 | 0 | 2 | 1 | 21,80 | 22,49 | 0 | 41 | 0 | 3110 | 1.22 |
| 905  | 27 | 2 | 2 | 3 | 17,58 | 18,75 | 0 | 39 | 1 | 3800 | 0.63 |
| 906  | 35 | 0 | 3 | 1 | 20,76 | 20,07 | 0 | 40 | 1 | 3680 | 1.26 |
| 910  | 33 | 0 | 2 | 0 | 24,17 | 23,05 | 0 | 39 | 1 | 3610 | 0.55 |
| 914  | 29 | 0 | 2 | 1 | 18,29 | 19,00 | 0 | 39 | 1 | 3180 | 0.88 |
| 920  | 34 | 0 | 3 | 1 | 25,95 | 25,30 | 0 | 40 | 0 | 3170 | 1.63 |
| 934  | 33 | 0 | 3 | 1 | 21,21 | 21,64 | 0 | 39 | 1 | 2910 | 0.26 |
| 938  | 35 | 0 | 3 | 0 | 20,70 | 21,64 | 1 | 40 | 0 | 3170 | 0.65 |
| 939  | 27 | 0 | 3 | 1 | 22,59 | 22,77 | 0 | 39 | 1 | 2820 | 0.29 |
| 942  | 36 | 2 | 3 | 1 | 20,35 | 21,89 | 0 | 38 | 0 | 2550 | 1.47 |
| 945  | 27 | 2 | 2 | 1 | 21,30 | 22,31 | 0 | 39 | 1 | 3300 | 1.09 |
| 955  | 31 | 0 | 3 | 1 | 20,08 | 21,56 | 0 | 39 | 0 | 3320 | 0.57 |
| 973  | 35 | 0 | 2 | 1 | 20,39 | 20,94 | 0 | 39 | 1 | 3280 | 0.52 |
| 974  | 38 | 2 | 2 | 1 | 27,68 | 28,37 | 0 | 41 | 0 | 2945 | 0.49 |
| 976  | 28 | 0 | 2 | 0 | 18,07 | 18,07 | 0 | 39 | 1 | 3220 | 0.57 |
| 982  | 36 | 0 | 2 | 1 | 21,94 | 22,68 | 0 | 40 | 1 | 3640 | 0.29 |
| 983  | 26 | 2 | 2 | 1 | 21,53 | 21,53 | 0 | 38 | 0 | 3420 | 0.61 |
| 991  | 28 | 0 | 2 | 1 | 18,94 | 18,25 | 0 | 40 | 1 | 3510 | 1.27 |
| 993  | 27 | 0 | 2 | 1 | 24,09 | 25,51 | 0 | 39 | 1 | 3460 | 1.82 |
| 995  | 25 | 0 | 3 | 1 | 18,73 | 19,65 | 0 | 41 | 1 | 2955 | 1.02 |
| 1004 | 33 | 2 | 2 | 1 | 19,53 | 19,53 | 0 | 41 | 0 | 3130 | 1.40 |
| 1005 | 27 | 0 | 2 | 0 | 18,90 | 19,68 | 0 | 39 | 1 | 3680 | 1.30 |
| 1006 | 31 | 0 | 3 | 1 | 24,97 | 24,56 | 0 | 41 | 1 | 3055 | 0.73 |
| 1007 | 28 | 0 | 2 | 1 | 21,41 | 24,68 | 0 | 39 | 0 | 3150 | 0.80 |
| 1009 | 30 | 2 | 3 | 1 | 20,05 | 20,05 | 0 | 41 | 1 | 4250 | 0.52 |
| 1010 | 29 | 0 | 4 | 1 | 24,27 | 24,80 | 0 | 41 | 0 | 3900 | 0.95 |
| 1016 | 30 | 2 | 4 | 1 | 21,05 | 21,72 | 0 | 40 | 1 | 3500 | 1.11 |
| 1020 | 31 | 0 | 2 | 0 | 23,39 | 23,39 | 0 | 41 | 0 | 3570 | 0.91 |
| 1025 | 29 | 2 | 3 | 0 | 18,63 | 19,01 | 0 | 39 | 1 | 3325 | 1.03 |
