# Supplementary material for: HtrA1 in Gestational Diabetes Mellitus: A Possible Biomarker?
Source: MDPI journal article supplement (doi:10.3390/diagnostics12112705), 2022-11-05
Supplement: s1 [file s1]

|      | ID     | Maternal Age | BMI   | Gestational age at delivery | Birth weight | Neonatal gender | Therapy | HtrA1 (ng/ml) |
|------|--------|--------------|-------|-----------------------------|--------------|-----------------|---------|---------------|
| CTRL | CTRS5  | 36           | 24,98 | 40,40                       | 3505         | 1               | NO      | 3,19          |
|      | CTRS6  | 30           | 21,09 | 38,20                       | 2800         | 0               | NO      | 4,30          |
|      | CTRS7  | 36           | 24,8  | 41,20                       | 2950         | 0               | NO      | 0,73          |
|      | CTRS8  | 32           | 26    | 39,30                       | 3400         | 1               | NO      | 1,22          |
|      | CTRS9  | 36           | 23,93 | 37,90                       | 3410         | 1               | NO      | 2,17          |
|      | CTRS10 | 32           | 23,8  | 40,90                       | 3260         | 1               | NO      | 3,90          |
|      | CTRS11 | 29           | 21,09 | 40,40                       | 3890         | 1               | NO      | 3,12          |
|      | CTRS13 | 32           | 27,75 | 38,30                       | 3590         | 0               | NO      | 0,57          |
|      | CTRS14 | 31           | 24,44 | 39,40                       | 3350         | 0               | NO      | 0,74          |
|      | CTRS15 | 27           | 28,38 | 40,00                       | 3560         | 1               | NO      | 0,15          |
|      | CTRS16 | 35           | 24,96 | 40,00                       | 3420         | 0               | NO      | 4,85          |
|      | CTRS17 | 22           | 18    | 40,70                       | 3170         | 1               | NO      | 5,92          |
|      | CTRS21 | 37           | 28,12 | 36,40                       | 3105         | 0               | NO      | 1,04          |
|      | CTRS22 | 34           | 22    | 37,60                       | 3530         | 1               | NO      | 0,78          |
|      | CTRS23 | 27           | 21,56 | 40,70                       | 3545         | 1               | NO      | 4,62          |
|      | CTRS24 | 36           | 19,48 | 40,50                       | 3240         | 1               | NO      | 2,71          |
|      | CTRS25 | 30           | 29,41 | 40,80                       | 3965         | 0               | NO      | 4,64          |
|      | CTRS26 | 40           | 21,61 | 37,00                       | 3542         | 1               | NO      | 1,22          |
|      | CTRS27 | 31           | 22,47 | 38,30                       | 3620         | 0               | NO      | 1,60          |
|      | CTRS28 | 35           | 23,73 | 39,20                       | 3750         | 0               | NO      | 0,82          |
|      | DGS2   | 45           | 18,5  | 39,60                       | 3090         | 1               | Diet    | 3,42          |
|      | DGS3   | 33           | 30,11 | 39,60                       | 4325         | 0               | Diet    | 8,21          |
|      | DGS4   | 35           | 21,56 | 36,00                       | 2735         | 0               | Diet    | 4,02          |
|      | DGS7   | 36           | 19,46 | 39,40                       | 3750         | 1               | Insulin | 4,13          |
|      | DGS9   | 36           | 21,20 | 38,00                       | 2685         | 1               | Insulin | 3,45          |
|      | DGS12  | 33           | 21,20 | 37,40                       | 2800         | 1               | Insulin | 4,48          |
|      | DGS14  | 35           | 23,18 | 33,70                       | 1720         | 0               | Diet    | 4,75          |
|      | DGS15  | 36           | 20,19 | 36,30                       | 2905         | 0               | Diet    | 6,39          |
|      | DGS16  | 38           | 21,22 | 40,40                       | 4035         | 1               | Diet    | 6,57          |
|      | DGS17  | 36           | 38    | 39,30                       | 2515         | 1               | Diet    | 5,94          |
|      | DGS18  | 35           | 19,57 | 39,00                       | 3200         | 0               | Insulin | 5,08          |
|      | DGS19  | 30           | 24,8  | 40,30                       | 3540         | 0               | Diet    | 6,19          |
|      | DGS20  | 30           | 23,8  | 40,80                       | 3375         | 0               | Diet    | 4,55          |
|      | DGS21  | 33           | 21,4  | 37,20                       | 2505         | 0               | Diet    | 2,77          |
|      | DGS22  | 47           | 20,83 | 38,80                       | 3230         | 1               | Insulin | 3,53          |
|      | DGS23  | 44           | 20,53 | 38,80                       | 2985         | 0               | Insulin | 3,44          |
|      | DGS24  | 39           | 28,04 | 39,50                       | 3635         | 1               | Insulin | 6,89          |
|      | DGS25  | 38           | 26,64 | 38,70                       | 3240         | 1               | Diet    | 1,85          |
| GDM  | DGS27  | 40           | 20,55 | 39,00                       | 3325         | 0               | Diet    | 1,11          |
|      | DGS28  | 40           | 35,62 | 38,70                       | 3390         | 0               | Diet    | 0,57          |

| Neonatal gender |   |
|-----------------|---|
| female          | 0 |
| male            | 1 |
